# Supplementary material for: A four gene signature of chromosome instability (CIN4) predicts for benefit from taxanes in the NCIC-CTG MA21 clinical trial
Source: PubMed Central journal article supplement (PMC5226493; doi:10.18632/oncotarget.8542), 2016-04-01
Supplement: oncotarget-07-49099-s001.pdf [file oncotarget-07-49099-s001.pdf]

## SUPPLEMENTARY TABLE

Supplementary Table S1: Experimental and housekeeping genes used in the gene expression study

| Experimental genes |        |          |                |          | Housekeeping genes |        |
|--------------------|--------|----------|----------------|----------|--------------------|--------|
| ACTL6A             | CCT5   | CKS2     | FOXM1          | MELK     | RFC4               | GUSB   |
| 14-3-3             | CDC2   | CMAS     | GPIandMGC13096 | MSH6     | RICTOR             | PUM1   |
| APC                | CDC20  | CNAP1    | H2AFX          | MTB      | RNASEH2A           | SF3A1  |
| ASF1B              | CDC25B | CTPS     | H2AFZ          | MTCH2    | RRM1               | TBP    |
| ATAD2              | CDC25C | DHCR7    | HDGF           | NDUFAB1  | RRM2               | TFRC   |
| ATM                | CDC3A  | DKC1     | ILK            | NEK2     | SFRS2              | TMED10 |
| ATR                | CDC45L | E2F1     | KIAA0286       | NUP205   | TGIF2              |        |
| AURKA              | CDC6   | ECT2     | KIF20A         | NXT1     | TOP2A              |        |
| AURKB              | CDCA8  | ELAV1    | KIF4A          | OIP5     | TOPK               |        |
| BRRN1              | CDK2   | ERK1     | LSM4           | P53      | TPX2               |        |
| bub1               | CDKN1A | ERK2     | MAD2           | PAXILLIN | TRIP13             |        |
| Bub3               | CEP55  | ESPL1    | MAD2L1         | PCNA     | TTK                |        |
| BuBR1              | CHEK1  | EZH2     | MCM10          | PRC1     | UBE2C              |        |
| ACTL6A             | CHEK2  | Fak      | MCM2           | PTTG1    | UNG                |        |
| CCNB1              | CDC2   | FEN1     | MCM7           | RAD21    | ZWINT              |        |
| CCNB2              | ch-TOG | FLJ10036 | MDM2           | RAD51AP1 |                    |        |
